# Supplementary material for: A Nosocomial Outbreak of Invasive Listeriosis in An Italian Hospital: Epidemiological and Genomic Features
Source: Pathogens. 2021 May 12;10(5):591. doi: 10.3390/pathogens10050591 (PMC8150339; doi:10.3390/pathogens10050591)
Supplement: Supplementary file 1 [file pathogens-10-00591-s001.zip]

Archive with 5 entries (5 files):
- Supplementary Figure S1.pdf
- Supplementary Figure S2.pdf
- Supplementary Table S1.xlsx
- Supplementary Table S2.xlsx
- Supplementary Table S3.xlsx
