# Supplementary material for: A Nosocomial Outbreak of Invasive Listeriosis in An Italian Hospital: Epidemiological and Genomic Features
Source: Pathogens. 2021 May 12;10(5):591. doi: 10.3390/pathogens10050591 (PMC8150339; doi:10.3390/pathogens10050591)
Supplement: Supplementary file 1 [file pathogens-10-00591-s001.zip › Supplementary Figure S1.pdf]

# Isolation date (mm/yy) and origin

- 05/18 Human case from Latina
- 07/19 Pecorino cheese from Tuscany
- 01/20 Human case from Tuscany
- 06/20 Human case from Latina
- 08/20 Human case from Latina
- 09/20 Human Case 1 from the present study \*
- 10/20 Kitchen slicer from the present study \*
- 10/20 Human Case 2 from the present study \*
- 10/20 Human Case 3 from the present study \*
- 10/20 Human Case 4 from the present study \*

\* Outbreak related strains

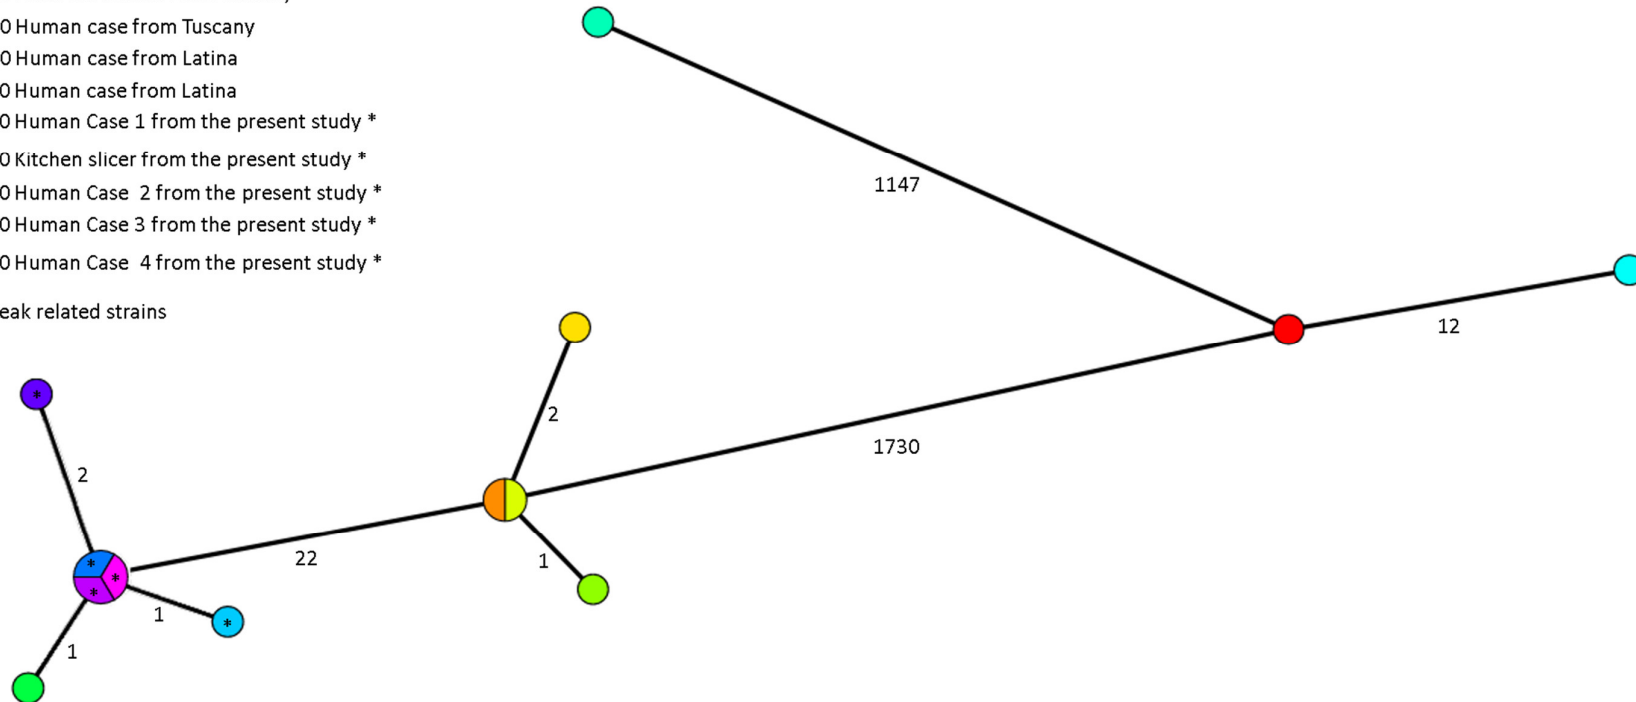

*Supplementary Figure 1.* Minimum Spanning Tree (MST) of all the human strains available to date from the Latina hospital, the ST451 strain from Tuscany, the isolate from the hospital kitchen slicer and the isolates from Pecorino cheese (Tuscany). For all the samples the month and year of isolation are indicated. The asterisks (\*) indicate the strains correlated to the nosocomial outbreak described in the study.
