# Supplementary material for: A Nosocomial Outbreak of Invasive Listeriosis in An Italian Hospital: Epidemiological and Genomic Features
Source: Pathogens. 2021 May 12;10(5):591. doi: 10.3390/pathogens10050591 (PMC8150339; doi:10.3390/pathogens10050591)
Supplement: Supplementary file 1 [file pathogens-10-00591-s001.zip › Supplementary Table S1.xlsx]

## Sheet: Foglio1
Supplementary Table 1. SNPs distance matrix calculated with CSI Phylogeny. In blue the isolates from Pecorino cheese, in yellow the isolate of human case from Tuscany, in green the isolates related with the nosocomial outbreak described in the study are highlighted. The asterisk (*) indicates the isolate from the hospital kitchen slicer.
	SAMN18631086	SAMN18631087	SAMN18631088	SAMN18631089	SAMN18631085	SAMN18220286	*SAMN18220290	SAMN18220287	SAMN18220288	SAMN18220289
SAMN18631086	0
SAMN18631087	2	0
SAMN18631088	3	3	0
SAMN18631089	3	3	2	0
SAMN18631085	285	285	284	284	0
SAMN18220286	285	285	284	284	4	0
*SAMN18220290	285	285	284	284	4	2	0
SAMN18220287	287	287	286	286	6	4	4	0
SAMN18220288	286	286	285	285	5	3	3	3	0
SAMN18220289	286	286	285	285	5	3	3	3	0	0
