# Supplementary material for: A Nosocomial Outbreak of Invasive Listeriosis in An Italian Hospital: Epidemiological and Genomic Features
Source: Pathogens. 2021 May 12;10(5):591. doi: 10.3390/pathogens10050591 (PMC8150339; doi:10.3390/pathogens10050591)
Supplement: Supplementary file 1 [file pathogens-10-00591-s001.zip › Supplementary Table S2.xlsx]

## Sheet: Foglio1
Supplementary Table 2. Complete list of virulence genes of L. monocytogenes according to VirulenceFinder 2.0 database, in brackets the corrispondig lmo code according to BIGSdb-Lm is indicated. If present, for each gene, the correspondig allele was indicated (from BIGSdb-Lm). (+) gene present, allele not specified. (-) gene not present. The new alleles are highlighted in yellow.
Gene name	SAMN18631085	SAMN18220286	SAMN18220287	SAMN18220288	SAMN18220289	SAMN18220290	SAMN18631086	SAMN18631087	SAMN18631088	SAMN18631089
ActA (lmo0204)	38	38	38	38	38	38	38	38	38	38
AgrA (lmo0051)	9	9	9	9	9	9	9	9	9	9
Ami (lmo2558)	48	48	48	48	48	48	48	48	48	48
Aut (lmo1076)	4	4	4	4	4	4	4	4	4	4
biLE (lmo1421)	33	33	33	33	33	33	33	33	33	33
bsh (lmo2067)	9	9	9	9	9	9	9	9	9	9
btlB (lmo0754)	+	+	+	+	+	+	+	+	+	+
chiA (lmo0105)	80	80	80	80	80	80	80	80	80	80
clpB (lmo2206)	45	45	45	45	45	45	45	45	45	45
clpc (lmo0232)	22	22	22	22	22	22	22	22	22	22
clpe (lmo0997)	421	421	421	421	421	421	45	45	45	45
clpp (lmo2468)	1	1	1	1	1	1	1	1	1	1
codY (lmo1280)	1	1	1	1	1	1	1	1	1	1
ctaP (lmo0135)	106	106	106	106	106	106	106	106	106	106
ctsR (lmo0229)	1	1	1	1	1	1	1	1	1	1
dal (lmo0886)	32	32	32	32	32	32	32	32	32	32
degU (lmo2515)	1	1	1	1	1	1	1	1	1	1
dltA (lmo0974)	2	2	2	2	2	2	2	2	2	2
Eut operon (lmo1171-lmo1187)	+	+	+	+	+	+	+	+	+	+
fbpA (lmo1829)	11	11	11	11	11	11	11	11	11	11
FlaA (lmo0690)	1	1	1	1	1	1	1	1	1	1
FlgE (lmo0697)	36	36	36	36	36	36	36	36	36	36
FlgC (lmo0711)	1	1	1	1	1	1	1	1	1	1
fri (lmo0943)	4	4	4	4	4	4	4	4	4	4
fur (lmo1956)	1	1	1	1	1	1	1	1	1	1
GadA (lmo0447)	-	-	-	-	-	-	-	-	-	-
GadB (lmo2363)	9	9	9	9	9	9	9	9	9	9
GadC (lmo2362)	61	61	61	61	61	61	61	61	61	61
Gmar (lmo0688)	14	14	14	14	14	14	14	14	14	14
gtcA (lmo2549)	1	1	1	1	1	1	1	1	1	1
hfq (lmo1295)	1	1	1	1	1	1	1	1	1	1
hly (lmo0202)	46	46	46	46	46	46	46	46	46	46
hupC (lmo2429)	26	26	26	26	26	26	26	26	26	26
uHpt (lmo0838)	11	11	11	11	11	11	11	11	42	42
htrA (lmo0292)	43	43	43	43	43	43	43	43	43	43
iap (cwh; lmo0582)	11	11	11	11	11	11	11	11	11	11
inlA (lmo0433)	324	324	324	324	324	324	64	64	64	64
inlB (lmo0434)	12	12	12	12	12	12	12	12	12	12
inlC (lmo1786)	2	2	2	2	2	2	2	2	2	2
inlF (lmo0409)	69	69	69	69	69	69	69	69	69	69
inlH (lmo0263)	9	9	9	9	9	9	9	9	9	9
inlJ (lmo2821)	8	8	8	8	8	8	8	8	8	8
inlk (lmo1290)	10	10	10	10	10	10	10	10	10	10
Lap (lmo1634)	10	10	10	10	10	10	10	10	10	10
LapB (lmo1666)	7	7	7	7	7	7	7	7	7	7
lhrC (ncRNA)	+	+	+	+	+	+	+	+	+	+
lgt (lmo2482)	2	2	2	2	2	2	2	2	2	2
lipA (lmo1800)	7	7	7	7	7	7	7	7	7	7
lisR (lmo1377)	1	1	1	1	1	1	1	1	1	1
lisK (lmo1378)	10	10	10	10	10	10	10	10	10	10
lmo0514	2	2	2	2	2	2	2	2	2	2
lmo0610	37	37	37	37	37	37	37	37	37	37
lmo2026	-	-	-	-	-	-	-	-	-	-
lmo2085	+	+	+	+	+	+	+	+	+	+
lntA (lmo0438)	8	8	8	8	8	8	8	8	8	8
lpeA (lmo1847)	10	10	10	10	10	10	10	10	10	10
lplA1 (lmo0931)	12	12	12	12	12	12	12	12	12	12
lsp (lmo1844)	1	1	1	1	1	1	1	1	1	1
mogR (lmo0674)	8	8	8	8	8	8	8	8	8	8
mpl (lmo0203)	12	12	12	12	12	12	12	12	12	12
mprf (lmo1695)	11	11	11	11	11	11	11	11	11	11
murA (lmo2691)	+	+	+	+	+	+	+	+	+	+
OatA (lmo1291)	9	9	9	9	9	9	9	9	9	9
OppA (lmo2196)	11	11	11	11	11	11	11	11	11	11
OrfX (lmo0206)	5	5	5	5	5	5	5	5	5	5
OrfZ (lmo0207)	9	9	9	9	9	9	9	9	9	9
perR (lmo1683)	1	1	1	1	1	1	1	1	1	1
pgdA (lmo0415)	10	10	10	10	10	10	10	10	10	10
pgl (lmo0558)	9	9	9	9	9	9	9	9	9	9
plcA (lmo0201)	13	13	13	13	13	13	13	13	13	13
plcB (lmo0205)	3	3	3	3	3	3	3	3	3	3
prfA (lmo0200)	1	1	1	1	1	1	1	1	1	1
prsA2 (lmo2219)	10	10	10	10	10	10	10	10	10	10
pycA (lmo1072)	44	44	44	44	44	44	44	44	44	44
recA (lmo1398)	1	1	1	1	1	1	1	1	1	1
relA (lmo1523)	42	42	42	42	42	42	42	42	42	42
Rli55 (lmo0922)	102	102	102	102	102	102	102	102	102	102
Rli60	+	+	+	+	+	+	+	+	+	+
Rsbv (lmo0893)	1	1	1	1	1	1	1	1	1	1
secA2 (lmo0583)	12	12	12	12	12	12	12	12	12	12
sigB (lmo0895)	1	1	1	1	1	1	1	1	1	1
sipX (lmo1269)	4	4	4	4	4	4	4	4	4	4
sipZ (lmo1271)	1	1	1	1	1	1	1	1	1	1
sod (lmo1439)	4	4	4	4	4	4	4	4	4	4
srtA (lmo0929)	1	1	1	1	1	1	1	1	1	1
srtB (lmo2181)	10	10	10	10	10	10	10	10	10	10
stp (lmo1821)	10	10	10	10	10	10	10	10	10	10
svpA (lmo2185)	9	9	9	9	9	9	9	9	9	9
tcsA (lmo1388)	1	1	1	1	1	1	1	1	1	1
tig (lmo1267)	4	4	4	4	4	4	4	4	4	4
vip (lmo0320)	1	1	122	122	122	1	1	1	1	1
virR (lmo1745)	1	1	1	1	1	1	1	1	1	1
