# Supplementary material for: A Nosocomial Outbreak of Invasive Listeriosis in An Italian Hospital: Epidemiological and Genomic Features
Source: Pathogens. 2021 May 12;10(5):591. doi: 10.3390/pathogens10050591 (PMC8150339; doi:10.3390/pathogens10050591)
Supplement: Supplementary file 1 [file pathogens-10-00591-s001.zip › Supplementary Table S3.xlsx]

## Sheet: metadata
Table S3. Isolates of L. monocytogenes ST451 available in public databases and used in the study.
ID	Database	Country	Year of isolation	Source
ERR1600119	Genbank	Switzerland	Unknown	Environmental
ERR1600120	Genbank	Switzerland	Unknown	Environmental
ERR1600140	Genbank	Switzerland	Unknown	Environmental
ERR1600146	Genbank	Switzerland	Unknown	Environmental
ERR2522412	Pasteur BIGSdb-Lm , Genbank	Poland	2012	Human
ERR2522464	Pasteur BIGSdb-Lm , Genbank	Poland	2012	Human
ERR2522535	Pasteur BIGSdb-Lm , Genbank	Poland	2014	Human
ERR2522588	Pasteur BIGSdb-Lm , Genbank	Poland	2015	Human
ERR25522560	Pasteur BIGSdb-Lm , Genbank	Poland	2014	Human
RID006054	Ridom at www.cgmlst.org/ncs/schema/690488/	USA	2013	Food
RID006624	Ridom at www.cgmlst.org/ncs/schema/690488/	USA	Unknown	Unknown
RID006625	Ridom at www.cgmlst.org/ncs/schema/690488/	USA	Unknown	Unknown
RID006795	Ridom at www.cgmlst.org/ncs/schema/690488/	USA	Unknown	Unknown
RID006972	Ridom at www.cgmlst.org/ncs/schema/690488/	USA	Unknown	Unknown
RID007122	Ridom at www.cgmlst.org/ncs/schema/690488/	USA	Unknown	Unknown
RID008336	Ridom at www.cgmlst.org/ncs/schema/690488/	Austria	2013	Human
RID008384	Ridom at www.cgmlst.org/ncs/schema/690488/	Austria	2015	Human
RID008386	Ridom at www.cgmlst.org/ncs/schema/690488/	Austria	2015	Human
RID009715	Ridom at www.cgmlst.org/ncs/schema/690488/	Austria	2014	Human
RID009850	Ridom at www.cgmlst.org/ncs/schema/690488/	Austria	2014	Human
RID010303	Ridom at www.cgmlst.org/ncs/schema/690488/	USA	2013	Food
RID010474	Ridom at www.cgmlst.org/ncs/schema/690488/	USA	2014	Human
RID010879	Ridom at www.cgmlst.org/ncs/schema/690488/	USA	2014	Human
RID011626	Ridom at www.cgmlst.org/ncs/schema/690488/	USA	2015	Human
RID011926	Ridom at www.cgmlst.org/ncs/schema/690488/	USA	2014	Environmental
RID013064	Ridom at www.cgmlst.org/ncs/schema/690488/	USA	Unknown	Unknown
RID022910	Ridom at www.cgmlst.org/ncs/schema/690488/	Austria	2015	Human
RID030198	Ridom at www.cgmlst.org/ncs/schema/690488/	Austria	2015	Food
RID030201	Ridom at www.cgmlst.org/ncs/schema/690488/	Austria	2015	Food
RID030224	Ridom at www.cgmlst.org/ncs/schema/690488/	Austria	2015	Human
RID031236	Ridom at www.cgmlst.org/ncs/schema/690488/	Austria	2015	Unknown
RID031271	Ridom at www.cgmlst.org/ncs/schema/690488/	Austria	2015	Unknown
RID036641	Ridom at www.cgmlst.org/ncs/schema/690488/	Austria	2016	Human
RID036643	Ridom at www.cgmlst.org/ncs/schema/690488/	Austria	2016	Human
RID036975	Ridom at www.cgmlst.org/ncs/schema/690488/	Austria	2015	Human
RID043863	Ridom at www.cgmlst.org/ncs/schema/690488/	Austria	2015	Unknown
RID043865	Ridom at www.cgmlst.org/ncs/schema/690488/	Austria	2015	Human
RID044888	Ridom at www.cgmlst.org/ncs/schema/690488/	Austria	2016	Unknown
RID045964	Ridom at www.cgmlst.org/ncs/schema/690488/	Austria	2016	Unknown
RID048342	Ridom at www.cgmlst.org/ncs/schema/690488/	Austria	2010	Unknown
RID056302	Ridom at www.cgmlst.org/ncs/schema/690488/	Austria	2015	Unknown
RID056304	Ridom at www.cgmlst.org/ncs/schema/690488/	Austria	2016	Unknown
RID056330	Ridom at www.cgmlst.org/ncs/schema/690488/	Austria	2016	Unknown
RID056537	Ridom at www.cgmlst.org/ncs/schema/690488/	Austria	2016	Human
RID058431	Ridom at www.cgmlst.org/ncs/schema/690488/	Austria	2016	Unknown
RID058434	Ridom at www.cgmlst.org/ncs/schema/690488/	Austria	2016	Unknown
SRR9114666	Pasteur BIGSdb-Lm , Genbank	Poland	2019	Food
